# Supplementary material for: Evolution of Responses to COVID-19 and Epidemiological Characteristics in South Korea
Source: MDPI journal article supplement (doi:10.3390/ijerph19074056), 2022-03-29
Supplement: s1 [file s1]

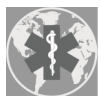

**Table S1.** Administrative social distancing measures in South Korea from March 2020 to July 2021 retrieved from KDCA COVID-19 press release.

| Date        | Administrative measures                                                           | Symbol | Period |
|-------------|-----------------------------------------------------------------------------------|--------|--------|
| 22 MAR 2020 | Commencement of social distancing program                                         | E1     | P1     |
| 6 MAY       | Relaxed to “social distancing in life”                                            | R1     | P2     |
| 16 AUG      | Upgrade to Level 2 in Seoul metropolitan area (SMA)                               | E2     | P3     |
| 23 AUG      | Nationwide expansion of Level 2                                                   |        |        |
| 30 AUG      | Upgrade to Level 2.5 in SMA                                                       | E3     |        |
| 14 SEP      | Downgrade to Level 2 in SMA.                                                      | R2     |        |
| 12 OCT      | Downgrade to Level 1 nationwide except some regions in SMA                        | R3     | P4     |
| 7 NOV       | Nationwide expansion of Level 1                                                   | R4     |        |
| 19 NOV      | Upgrade to Level 1.5 in SMA and some areas of Gangwon                             | E4     |        |
| 23 NOV      | Upgrade to Level 2 in SMA                                                         |        |        |
| 1 DEC       | Upgrade to Level 1.5 nationwide outside SMA                                       |        |        |
| 8 DEC       | Upgrade to Level 2.5 in SMA and Level 2 nationwide outside SMA                    | E5     |        |
| 28 DEC      | Stronger Level 2.5 in SMA and stronger Level 2 nationwide outside SMA             | E6     |        |
| 15 FEB 2021 | Downgrade to Level 2 in SMA and Level 1.5 nationwide outside SMA                  | R5     |        |
| 26 FEB      | Commencement of vaccination against COVID-19                                      |        | P5     |
| 12 JUL      | Upgrade to Level 4 (the highest level) in SMA                                     | E7     | P6     |
| 15 JUL      | Upgrade to Level 2 nationwide except SMA, Sejong, Jeonbuk, Jeonnam, and Gyeongbuk |        |        |

**Table S2.** Linear regressions of confirmed cases vs unlinked and asymptomatic cases.

| Type         | Coefficients               | P1    | P2    | P3    | P4    | P5     | P6     |
|--------------|----------------------------|-------|-------|-------|-------|--------|--------|
| Unlinked     | Slope ( $\times 10^{-4}$ ) | 11.9  | 60.5  | 15.0  | 1.45  | 3.90   | -0.20  |
|              | Pearson                    | 0.557 | 0.376 | 0.668 | 0.386 | 0.463  | -0.113 |
|              | <i>p</i> -value            | 0.000 | 0.001 | 0.000 | 0.000 | 0.000  | 0.365  |
| Asymptomatic | Slope ( $\times 10^{-4}$ ) | 0.41  | 28.7  | 2.84  | 0.54  | -0.51  | -0.46  |
|              | Pearson                    | 0.024 | 0.255 | 0.256 | 0.325 | -0.137 | -0.104 |
|              | <i>p</i> -value            | 0.809 | 0.026 | 0.015 | 0.000 | 0.112  | 0.407  |

**Table S3.** Regional shares of confirmed cases relative to population size with abbreviations Seoul (SL), Busan (BS), Daegu (DG), Incheon (IC), Gwangju (GJ), Daejeon (DJ), Ulsan (UL), Sejong (SJ), Gyeonggi (GG), Gangwon (GW), Chungbuk (CB), Chungnam (CN), Jeonbuk (JB), Jeonnam (JN), Gyeongbuk (GB), Gyeongnam (GN), and Jeju (JJ).

| Period | SL       | BS    | DG   | IC   | GJ   | DJ   | UL   | SJ   | GG   | GW    | CB   | CN   | JB   | JN   | GB   | GN   | JJ   |
|--------|----------|-------|------|------|------|------|------|------|------|-------|------|------|------|------|------|------|------|
| 1      | Unlinked | -16.0 | -5.6 | 72.4 | -5.4 | -2.8 | -2.6 | -2.0 | -0.3 | -21.8 | -2.6 | -2.8 | -3.7 | -3.5 | 7.3  | -5.8 | -1.3 |
|        | Linked   | -9.6  | -4.8 | 29.7 | -3.8 | -1.8 | -2.3 | -1.0 | 0.0  | -10.3 | -2.6 | -1.7 | 2.4  | -3.3 | 16.5 | -2.9 | -1.2 |
| 2      | Unlinked | 23.4  | -6.3 | -1.1 | 2.0  | 4.5  | 2.2  | -2.1 | -0.7 | 3.5   | -2.4 | -2.8 | -2.3 | -3.2 | -4.2 | -6.1 | -1.2 |
|        | Linked   | 13.9  | -6.2 | -3.2 | 10.6 | 4.2  | 3.4  | -2.2 | -0.2 | 3.7   | -2.4 | -2.3 | -2.3 | -3.0 | -4.0 | -5.9 | -1.3 |
| 3      | Unlinked | 21.0  | -3.9 | -2.6 | 1.2  | 0.4  | -1.4 | -1.4 | -0.5 | 7.5   | -1.4 | -2.5 | -1.5 | -2.8 | -4.0 | -5.2 | -1.0 |
|        | Linked   | 18.6  | -2.4 | -3.5 | -0.8 | 0.3  | 0.7  | -1.3 | -0.5 | 7.5   | -1.4 | -1.8 | -1.0 | -2.3 | -3.0 | -5.5 | -0.8 |
| 4      | Unlinked | 19.6  | -3.6 | -2.8 | -1.0 | -2.2 | -1.7 | -1.4 | -0.4 | 9.7   | -0.1 | -0.9 | -1.2 | -2.9 | -2.5 | -4.5 | -1.0 |
|        | Linked   | 13.6  | -1.4 | -2.1 | 1.2  | 0.8  | -1.4 | -0.6 | -0.5 | 0.8   | -0.7 | -0.4 | -0.9 | -1.3 | -2.3 | -2.7 | -0.2 |
| 5      | Unlinked | 18.7  | -2.0 | -3.6 | -1.1 | -2.0 | -0.8 | 0.1  | -0.2 | 7.3   | 0.3  | -1.1 | -2.0 | -2.4 | -3.6 | -3.7 | -0.7 |
|        | Linked   | 10.5  | -2.3 | 0.5  | -3.1 | -0.9 | 0.0  | -0.6 | -0.2 | 3.9   | -2.0 | -0.8 | -2.1 | -1.0 | -1.8 | 0.2  | 0.2  |
| 6      | Unlinked | 20.2  | -4.4 | -3.0 | 0.1  | -2.1 | -0.6 | -1.5 | -0.4 | 10.1  | -0.7 | -1.8 | -1.6 | -2.8 | -4.0 | -4.5 | -0.7 |
|        | Linked   | -12.8 | 7.5  | 3.9  | -2.1 | 0.7  | 3.3  | 2.7  | 0.2  | -15.5 | -2.0 | 1.1  | 3.3  | 0.1  | 1.2  | 7.4  | 2.0  |

**Table S4.** Shares of confirmed cases normalized by the population size in each age bracket after Shincheonji church mass infection in P1 and 8/15 rally in P3.

| Period      | Type     | < 20   | 20–29  | 30–39  | 40–49  | 50–59 | 60–69  | 70–79  | > 79   |
|-------------|----------|--------|--------|--------|--------|-------|--------|--------|--------|
| Shincheonji | Unlinked | -0.106 | 0.257  | -0.032 | -0.033 | 0.008 | -0.027 | -0.036 | -0.030 |
|             | Linked   | -0.054 | 0.079  | -0.011 | -0.026 | 0.047 | -0.006 | -0.018 | -0.010 |
| 8/15 rally  | Unlinked | -0.095 | -0.053 | -0.056 | -0.040 | 0.044 | 0.148  | 0.056  | -0.004 |
|             | Linked   | -0.058 | -0.017 | -0.036 | -0.065 | 0.028 | 0.077  | 0.056  | 0.015  |

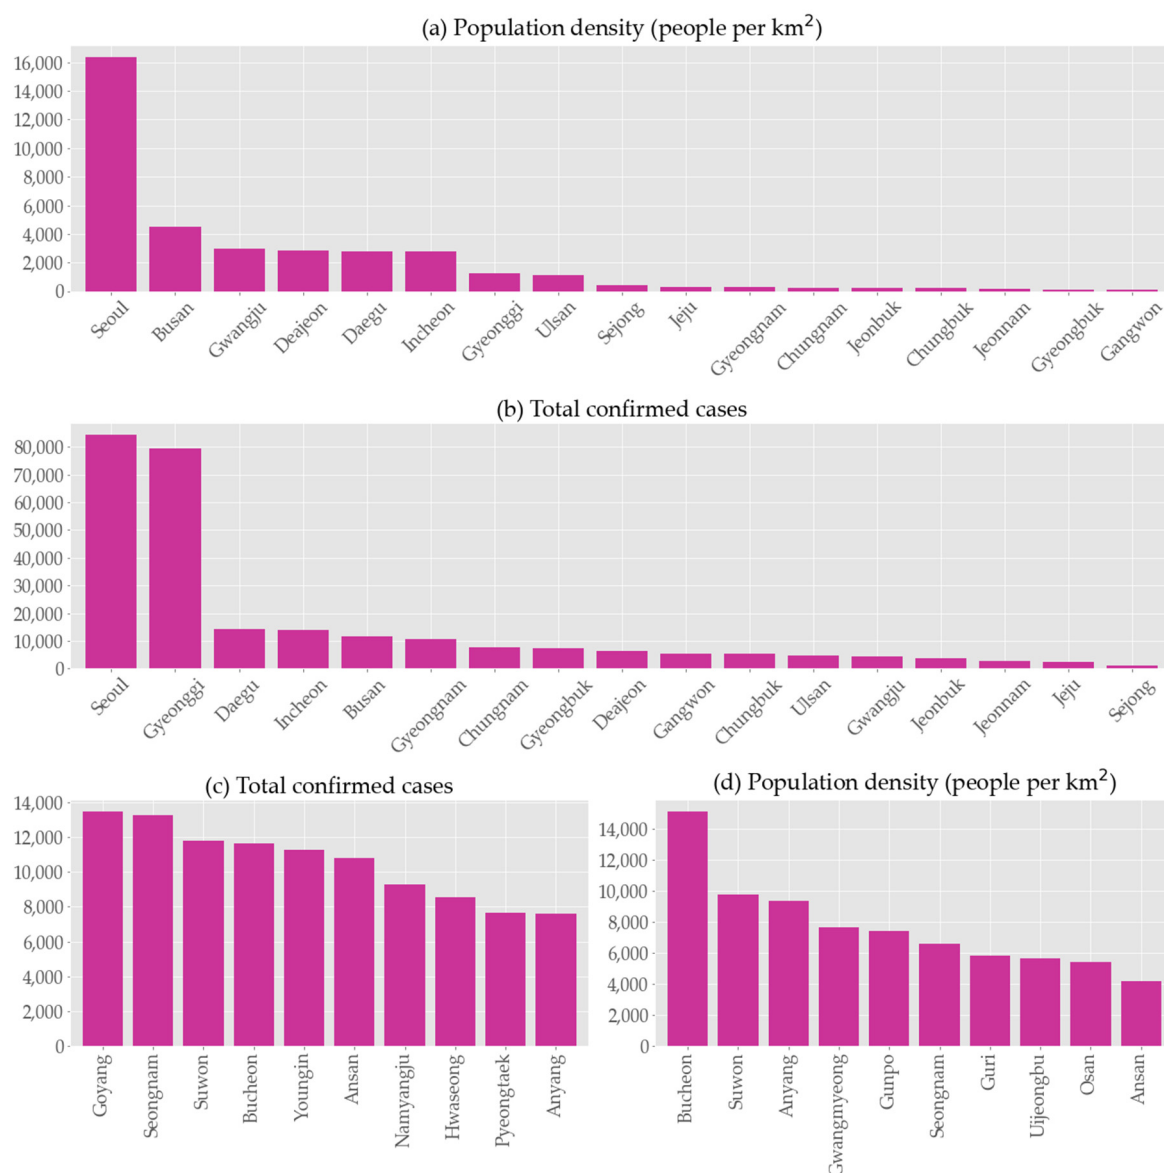

**Figure S1.** (a) Population density by region, (b) regional total numbers of confirmed cases by 16 SEP 2021, (c) regional total numbers of confirmed cases in Gyeonggi by DEC 2021, and (d) regional population density in Gyeonggi.

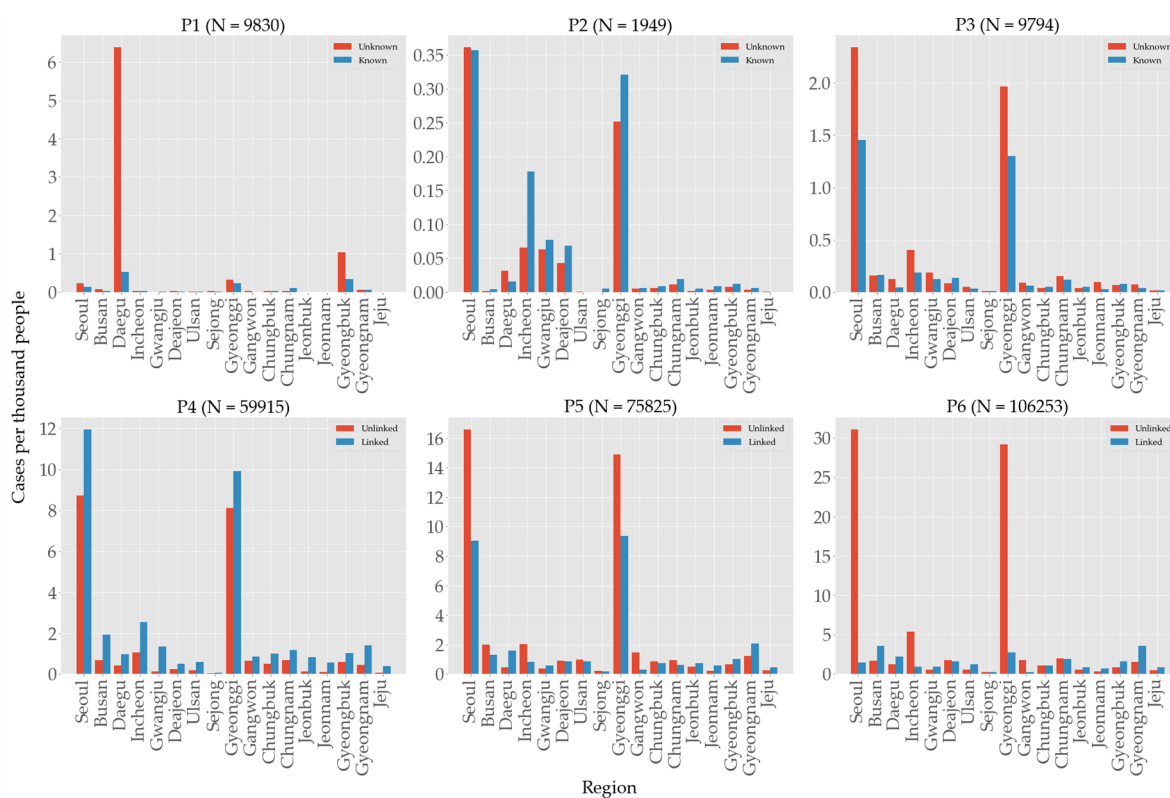

**Figure S2.** Regional numbers of infections per 1,000 people.

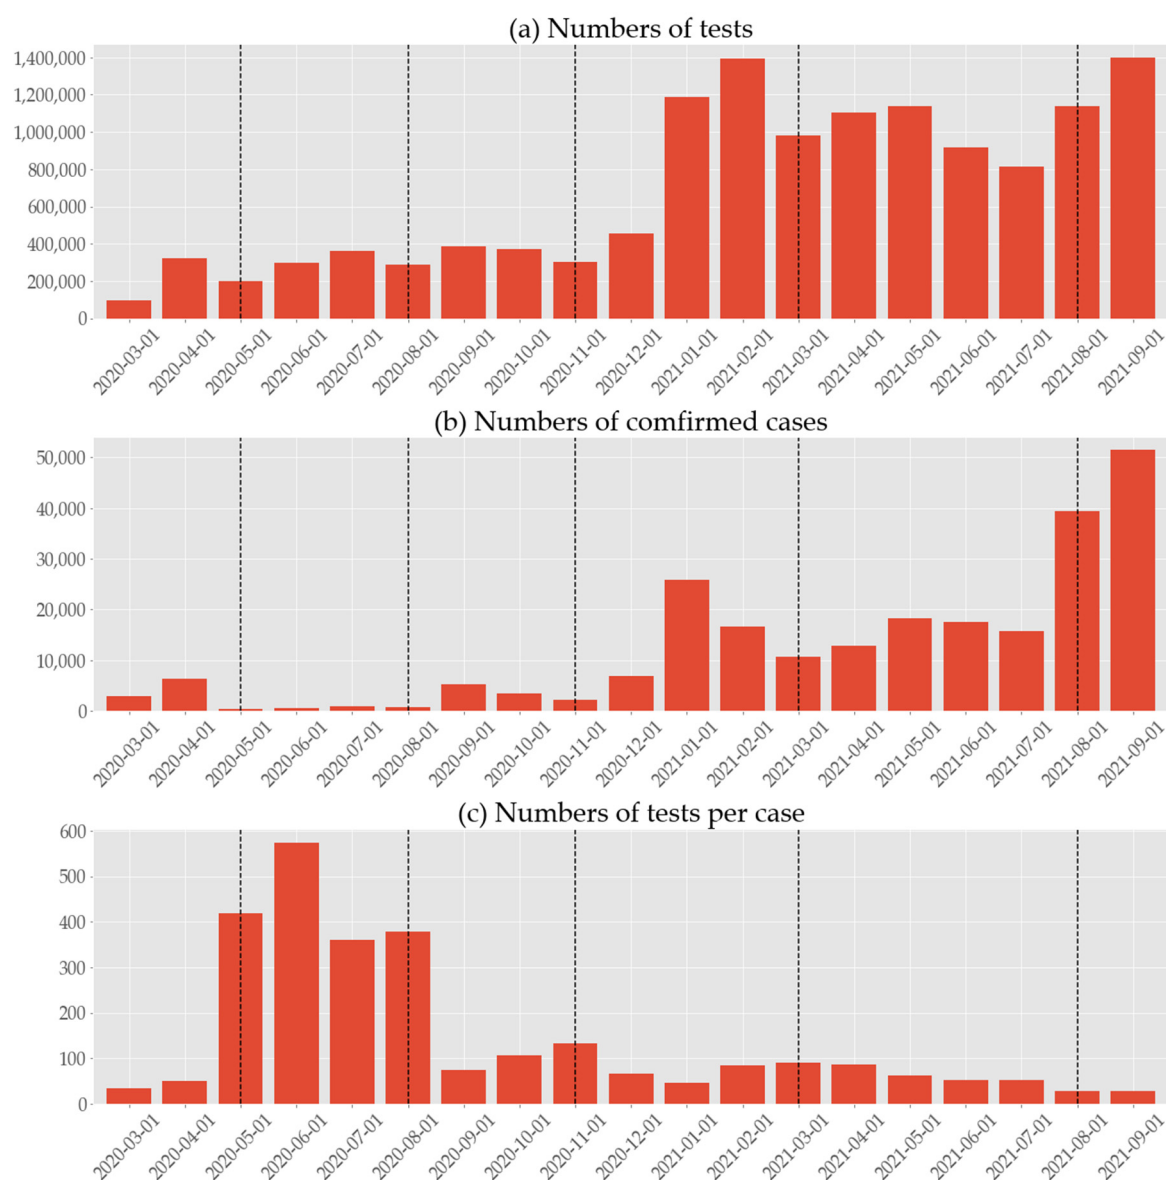

**Figure S3.** Monthly numbers of (a) tests, (b) cases, and (c) tests per case.

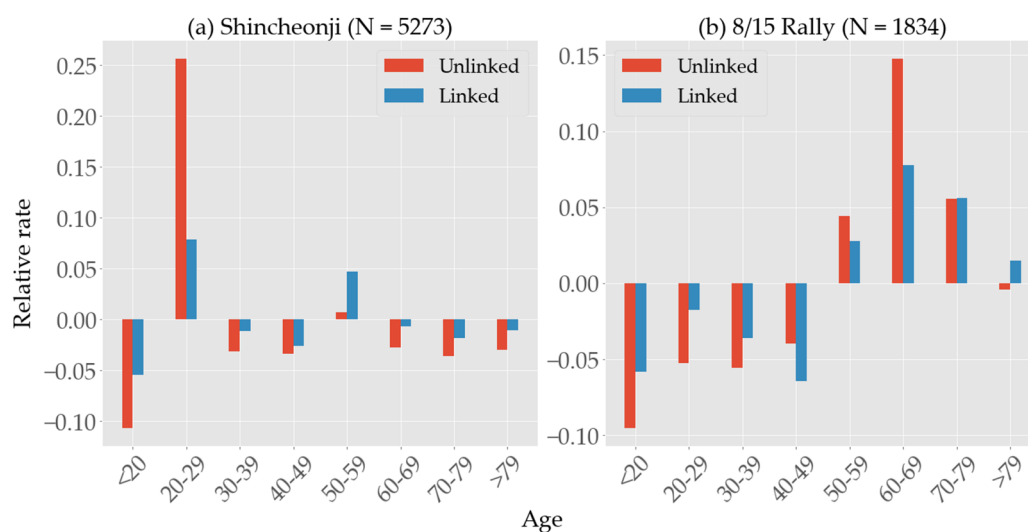

**Figure S4.** Shares of confirmed cases normalized by the population size in each age bracket (a) after Shincheonji church mass infection in P1 and (b) 8/15 rally in P3, contrasting two age groups severely affected by the incidents.

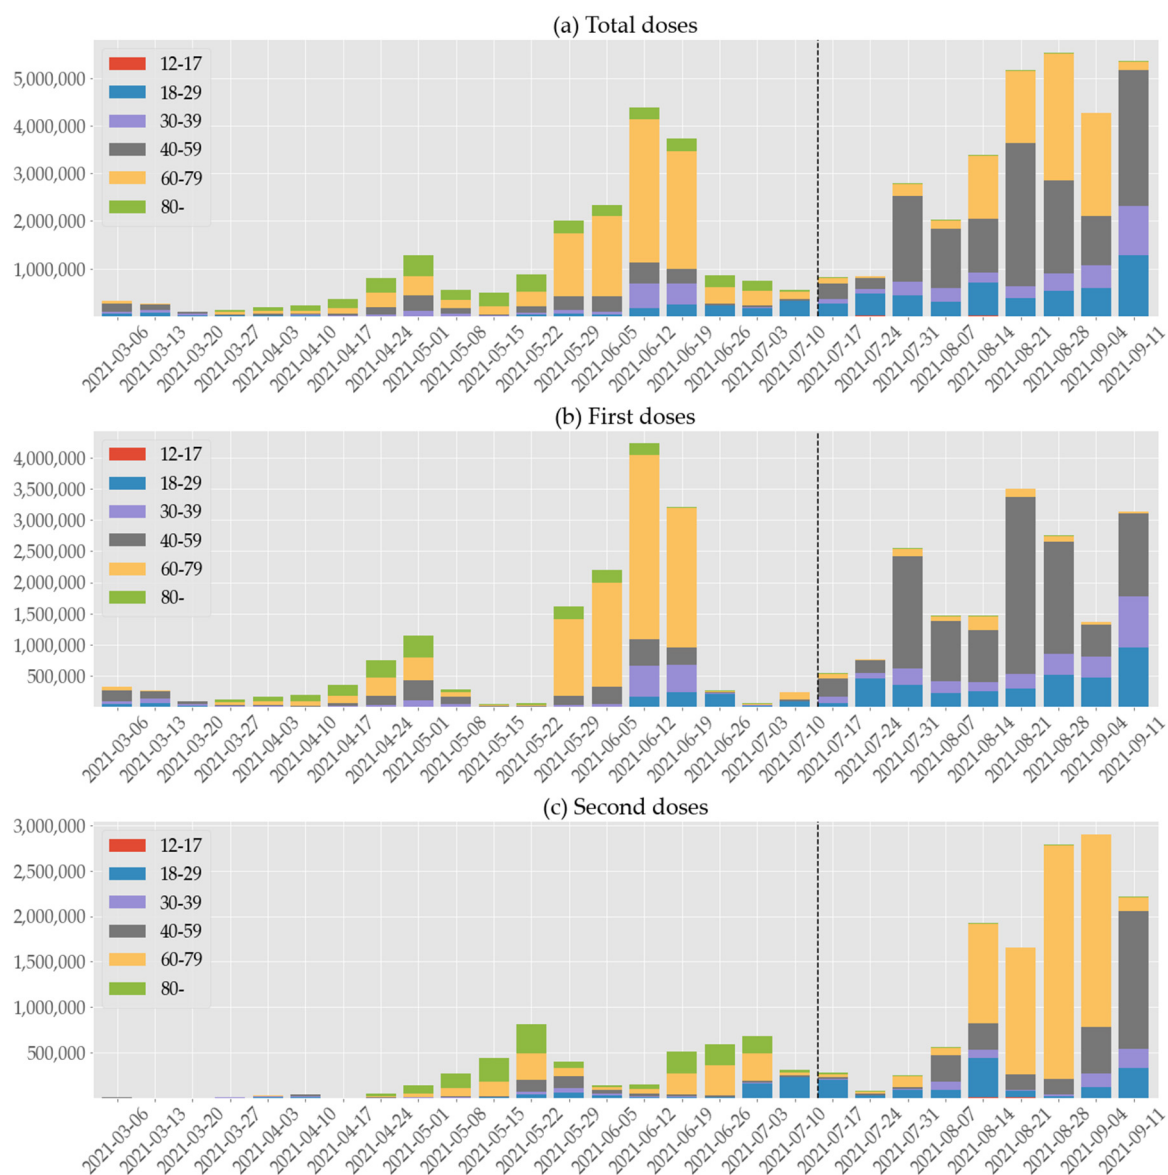

**Figure S5.** Weekly vaccine uptake in age groups (a) total doses, (b) first doses, and (c) second doses.

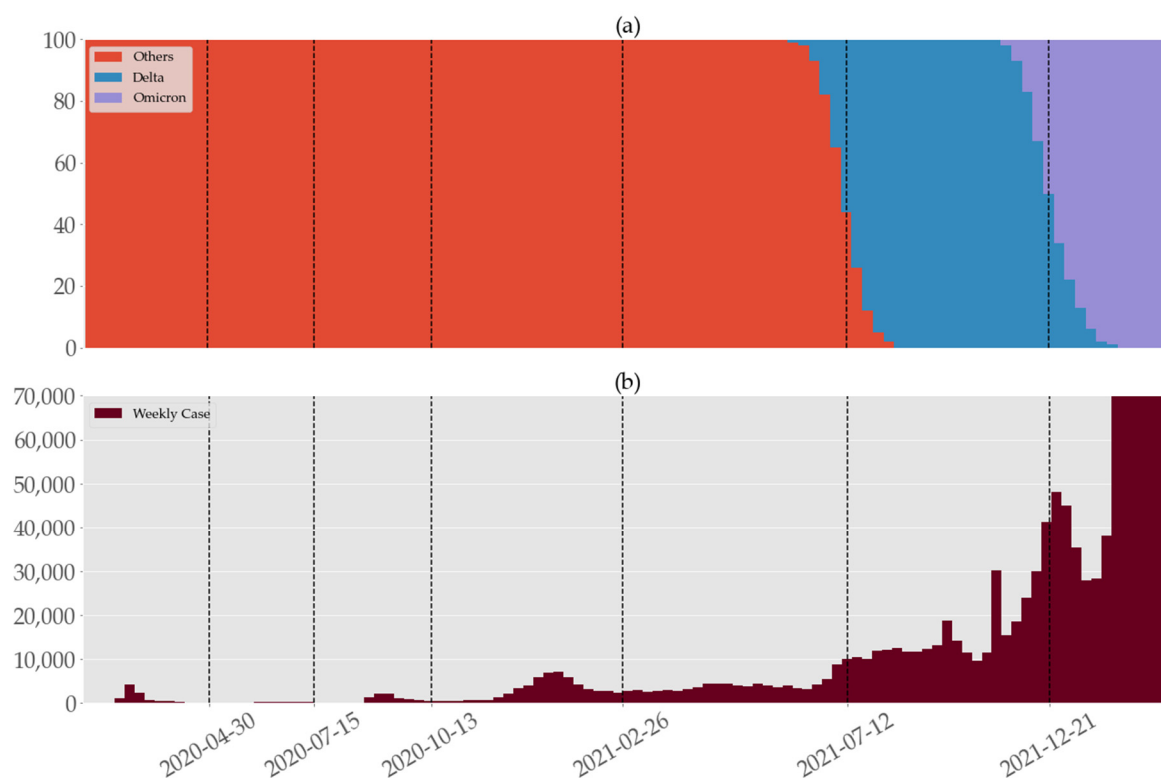

**Figure S6.** (a) Weekly percentage of variants of concern from 30 January 2020 to 27 February 2022. “Others” includes early mutations such as alpha and beta. The first five vertical lines delineate the 6 periods in the manuscript, while the last one marks the time when the omicron variant exceeds 50%. (b) Weekly numbers of confirmed cases where data exceeding 70,000 were truncated.
